# Supplementary material
Source: PubMed Central journal article supplement (PMC3444267)
Supplement: supp_ers203_00082297_file001.pdf [file supp_ers203_00082297_file001.pdf]

**Members of the germin-like protein family in *Brassica napus* are candidates for the initiation of an oxidative burst that impedes pathogenesis of *Sclerotinia sclerotiorum*.**

**Steffen Rietz, Friederike Bernsdorff and Daguang Cai**

**Table S1.** Primer combinations for qPCR analysis of the *BnGLP* gene family and tubulin as reference gene.

|                | Forward 5'-3'             | Reverse 5'-3'             |
|----------------|---------------------------|---------------------------|
| <i>BnGLP1</i>  | TGATGGGTACCTCCATGTCTCGT   | GGCAGGAGCATTGTTAGGGTTCT   |
| <i>BnGLP2</i>  | CCGTCAATGTTAGCAACCTTCCA   | GTTTTGGTGAAGAGGCGATTCC    |
| <i>BnGLP3</i>  | GGTTTCTCACCACCGCCAATAG    | AACCGAACAGAGTAGCGCCAAG    |
| <i>BnGLP4</i>  | ATTTCTTCTTTGCGGGCATCAG    | CTCGCCTTCCAACACGAAGATT    |
| <i>BnGLP5</i>  | AATTCTGTAAGGATCCGAAGCAAGC | TCGATTAGGACAAGGATCTCAGTGC |
| <i>BnGLP6</i>  | TGGTCCTGGCGACATGTTTG      | GGAATCGCTGGTTTCGCAAG      |
| <i>BnGLP7</i>  | GCTGATCTCAAACCCGGAGCTA    | CCGGGGCTTTGGCTATTAAGTC    |
| <i>BnGLP8</i>  | ACCCTGACCAAGTCACCGAAAAT   | TGTGAAGAGGAATGACACCACCA   |
| <i>BnGLP9</i>  | GTAGCTGATCCGAGCGGTCTT     | CCAGCGGCTAAGTCAAGACGA     |
| <i>BnGLP10</i> | CAAGACTTCTGTGTGGCCAACCT   | AGTGTGCATTGGGATCACACCTT   |
| <i>BnGLP11</i> | CTCCTCCTCATTACCTCACCAA    | ATTGTGTTGAGACCCGGGAGATT   |
| <i>BnGLP12</i> | TCCCTCTCATCTGACCCTGACC    | GGAGCGAACTCAACGTTGTTCA    |
| <i>BnGLP13</i> | ACGTCGGGTTTTGTTTCTTCCAA   | ACACAGCGTTTTCGATTGTGAT    |
| <i>BnGLP14</i> | TTCGTAACAACCGCAGGGAAA     | GCGACTGTGTTCCAGGCAACT     |
| <i>Tubulin</i> | AGGTCTCCGACACTGTTGTTG     | GGAGTTGAGTTGACCAGGGA      |

**Members of the germin-like protein family in *Brassica napus* are candidates for the initiation of an oxidative burst that impedes pathogenesis of *Sclerotinia sclerotiorum*.**

Steffen Rietz, Friederike Bernsdorff and Daguang Cai

**Table S2.** Primer combinations for full length gene cloning into the pDONR201 Gateway vector.

|                |         | 5' - 3'                                                |
|----------------|---------|--------------------------------------------------------|
| <i>BnGLP3</i>  | forward | GGGGACAAGTTTGTACAAAAAAGCAGGCTATGGCTTCACCAACTTCATT      |
|                | reverse | GGGGACCACTTTGTACAAGAAAGCTGGGTCTTTCTTGGGCTGGAACCTGC     |
| <i>BnGLP7</i>  | forward | GGGGACAAGTTTGTACAAAAAAGCAGGCTATGTTTCTTACAAAAGCTCTTC    |
|                | reverse | GGGGACCACTTTGTACAAGAAAGCTGGGTTCATGTTTCATTAGACATGACAG   |
| <i>BnGLP8</i>  | forward | GGGGACAAGTTTGTACAAAAAAGCAGGCTATGAAGATGATAATTCACAT      |
|                | reverse | GGGGACCACTTTGTACAAGAAAGCTGGGTTCATCAGTTCCTCCAAGCACAC    |
| <i>BnGLP10</i> | forward | GGGGACAAGTTTGTACAAAAAAGCAGGCTATGTTGCGCACTATCTTCCT      |
|                | reverse | GGGGACCACTTTGTACAAGAAAGCTGGGTTCATGAGTCCCAAGTATCTTTT    |
| <i>BnGLP12</i> | forward | GGGGACAAGTTTGTACAAAAAAGCAGGCTATGGCTTCTCTTTTCACATC      |
|                | reverse | GGGGACCACTTTGTACAAGAAAGCTGGGTCAACAGCAAACCTTGGACTTGAG   |
| <i>gf2.8</i>   | forward | GGGGACAAGTTTGTACAAAAAAGCAGGCTATGGGGTACTCCAAAACCCTAGT   |
|                | reverse | GGGGACCACTTTGTACAAGAAAGCTGGGTCAAACCCAGCGGCAAACCTTGGACT |
| <i>GFP</i>     | forward | GGGGACAAGTTTGTACAAAAAAGCAGGCTATGGTGAGCAAGGGCGAGGA      |
|                | reverse | GGGGACCACTTTGTACAAGAAAGCTGGGTCTTGTACAGCTCGTCCATGC      |

Figure S1

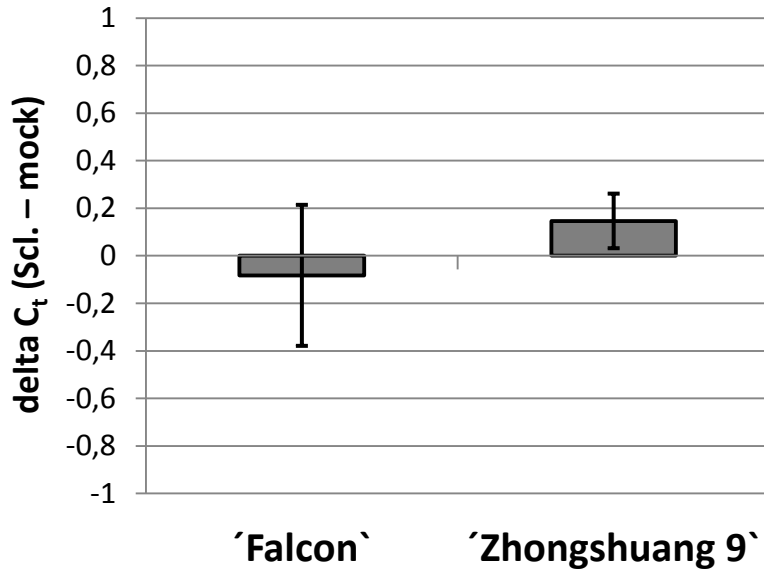

**Figure S1.** Differential transcription of the  $\beta$ -tubulin reference gene between mock and *S. sclerotiorum* treated leaf samples of *B. napus* 'Falcon' and 'Zhongshuang 9'. Quantitative RT-PCR was used to determine cycle threshold ( $C_t$ ) values of  $\beta$ -tubulin as a reference to normalize *BnGLP* gene transcript level in Fig. 2B and C. Shown are the differences in  $\beta$ -tubulin  $C_t$  values between 6 h *S. sclerotiorum* and 6 h mock treatments. Columns represent the averages of four independent experiments with bars depicting corresponding standard errors.
